# Supplementary material
Source: publisher figshare collection journal article supplement (https://acs.figshare.com/ndownloader/files/5275075)
Supplement: Supplementary file 1 [file 5275075]

# Nucleation and Growth Control of $\text{HC}(\text{NH}_2)_2\text{PbI}_3$ for Planar Perovskite Solar Cell

*Jincheol Kim,<sup>†</sup> Jae S. Yun,<sup>†</sup> Xiaoming Wen,<sup>†</sup> Arman Mahboubi Soufiani,<sup>†</sup> Cho Fai Jonathan Lau,<sup>†</sup> Benjamin Wilkinson,<sup>†</sup> Jan Seidel,<sup>‡</sup> Martin A. Green,<sup>†</sup> Shujuan Huang,<sup>†</sup> and Anita W. Y. Ho-Baillie<sup>\*†</sup>*

<sup>†</sup> The Australian Centre for Advanced Photovoltaics (ACAP), School of Photovoltaic and Renewable Energy Engineering, University of New South Wales, Sydney 2052, Australia

<sup>‡</sup> School of Materials Science and Engineering, University of New South Wales, Sydney 2052, Australia

## Corresponding Author

<sup>\*</sup> Anita W. Y. Ho-Baillie

School of Photovoltaic and Renewable Energy Engineering, University of New South Wales,  
Sydney 2052, Australia

E-mail: a.ho-baillie@unsw.edu.au. Phone: +61 2 9385 4257

## METHODS

**Materials.** All chemicals were purchased from Sigma-Aldrich or Alfa Aesar or Lumtec (Luminescence Technology Corp.) and used without further purification.  $\text{HC}(\text{NH}_2)_2\text{I}$  were synthesized by reacting 15 g formamidine acetate and 30 ml HI (57 wt% in water) in 100 ml ethanol at 0 °C for 2 hours with stirring. The precipitate was recovered by rotary evaporator at 50 °C for 1 hour. The white crystals were obtained by washing with diethyl ether followed by recrystallization from Ethanol.

**Sample fabrication.** A dense blocking layer of  $\text{TiO}_2$  was deposited by spray pyrolysis (~50 nm) using 20 mM titanium diisopropoxide bis(acetylacetonate) solution at 450 °C on the clean FTO glass (TEC8). To prepare 1.2M  $\text{HC}(\text{NH}_2)_2\text{PbI}_3$  solution, the prepared  $\text{HC}(\text{NH}_2)_2\text{I}$  is mixed with  $\text{PbI}_2$  in Dimethylformamide (DMF) at 1:1 mole ratio at room temperature. The solutions with added HI (57 wt% in water) at specific molar ratio (0 g, 0.05 g, 0.10 g, and 0.20 g of HI solution in 1 ml of  $\text{HC}(\text{NH}_2)_2\text{PbI}_3/\text{DMF}$  solution) were spread on the bl- $\text{TiO}_2/\text{FTO}$  and spun at 6500 rpm for 30 s using gas-assisted method. The films were dried on a hot plate at 160 °C for 20 min. A solution of Spiro-OMeTAD containing 41.6 mg Spiro-OMeTAD, 7.5  $\mu\text{l}$  of a 500 mg  $\text{ml}^{-1}$  lithium bis (trifluoro-methylsulphonyl)imide in acetonitrile and 16.9  $\mu\text{l}$  4-tert-butylpyridine in 0.5 ml chlorobenzene was spin-coated on the  $\text{HC}(\text{NH}_2)_2\text{PbI}_3/\text{bl-TiO}_2/\text{FTO}$  substrate at 3000 rpm for 30 s. All films on bl- $\text{TiO}_2$  were prepared in nitrogen filled glovebox. A 100 nm gold electrode was deposited by thermal evaporation.

**Characterization.** X-ray diffraction (XRD) patterns were measured using a PANalytical Xpert Materials Research diffractometer system with a Cu  $K\alpha$  radiation source ( $\lambda = 0.1541 \text{ nm}$ ) at 45 kV and 40 mA. Top-view and cross-sectional SEM images were obtained using a field emission

SEM (NanoSEM 230). KPFM measurements were carried out using an AFM (AIST-NT SmartSPM™ 1000) in air, a gold coated Si tip with 6 nm radius of curvature (HYDRA6R-100NG-10, APPNANO) as the probe in a non-contact mode and with an AC voltage of -1 to +1 V. The PL spectrum was measured using a spectrometer detected by a thermoelectric cooled Si-CCD detector, with excitation at 405 nm. Time-resolved PL was measured by Microtime 200 system (Picoquant) with TCSPC technique excited at 470 nm. For electroluminescence measurements, a commercially available 1-mega-pixel Si-CCD camera (Princeton Instruments, Trenton, NJ, USA) was used to detect the luminescence signal. A 750-850 nm bandpass filter was used before the camera lens to exclusively detect the emission from the perovskite active layer. The voltage bias control and current reading was performed by a source measurement unit (Agilent Technologies). The J–V measurements were performed using an IV5 solar cell I–V testing system from PV measurements, Inc. (using a Keithley 2400 source meter) under illumination power of  $100 \text{ mW cm}^{-2}$  by an AM1.5G solar simulator (Oriel model 94023A) with an  $0.159 \text{ cm}^2$  aperture and a scan rate of  $1.2 \text{ V s}^{-1}$ . All J-V measurements were undertaken at room temperature in ambient condition.

**Thermal cycling.** The thermal cycling test (IEC61646 standard) consisted of 10 cycles of:  $23^\circ\text{C}$  to  $-40^\circ\text{C}$  over 40 minutes; 10 minutes at  $-40^\circ\text{C}$ ;  $-40^\circ\text{C}$  to  $85^\circ\text{C}$  over 75 minutes, 10 minutes at  $85^\circ\text{C}$ ;  $85^\circ\text{C}$  to  $23^\circ\text{C}$  over 36 minutes. Humidity was not controlled and was allowed to vary from 5 % to 60 % relative humidity. The test was carried out in an ESPEC SMS-2 environmental chamber. The temperature and humidity data were recorded by the in-built ESPEC thermocouple and humidity sensors, as well as an ONSET HOBO MX1101 humidity and temperature probe close to the sample which is the main temperature and humidity data source.

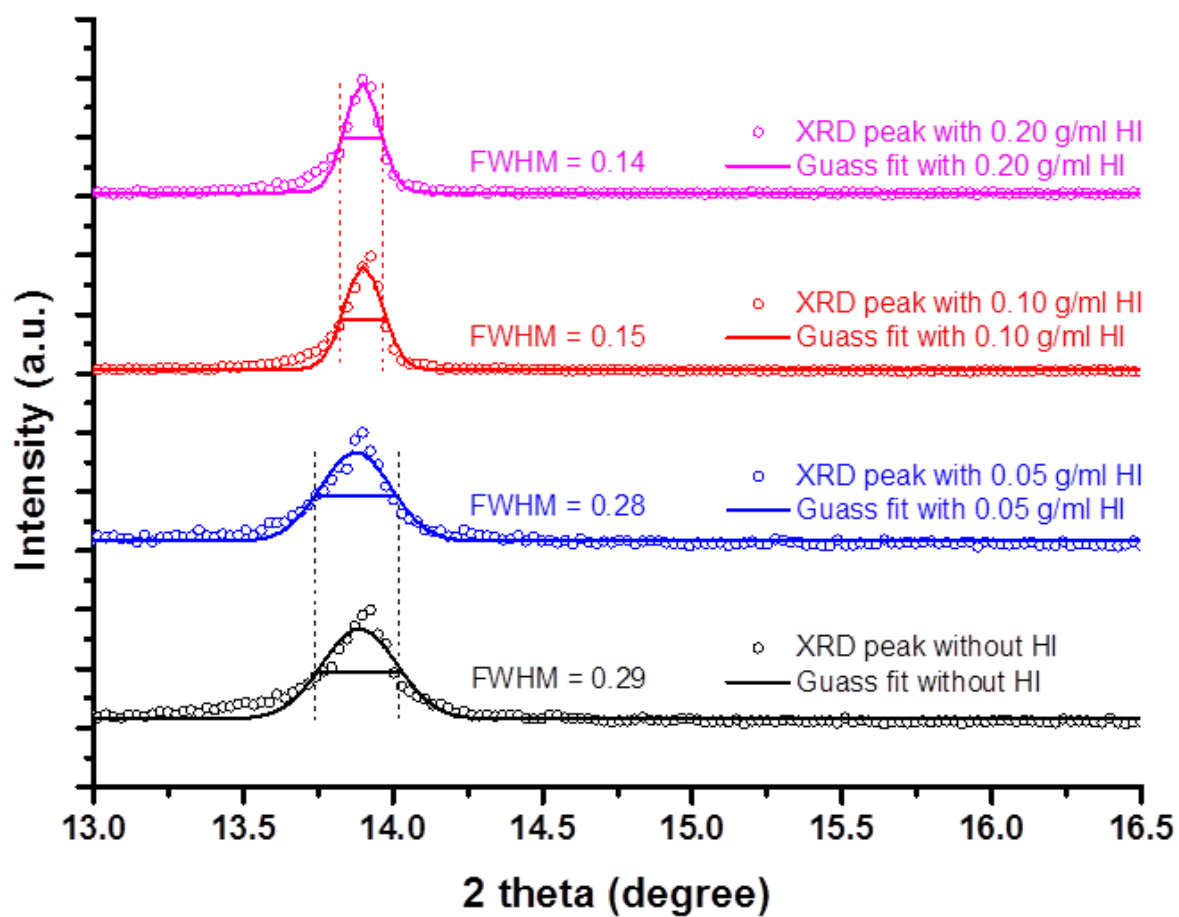

**Figure S1.** Full width at half maximum (FWHM) of the (110) peak for  $\text{HC}(\text{NH}_2)_2\text{PbI}_3$  films formed by various concentration of HI additive in the  $\text{HC}(\text{NH}_2)_2\text{PbI}_3/\text{DMF}$  solution.

Kelvin probe force microscopy (KPFM) allows for high lateral resolution measurements of spatial variations of the electrical properties of the devices at the nanometer scale. KPFM is a surface potential detection method that determines the contact potential difference (CPD) during scanning by compensating the electrostatic forces between the probe and the sample. KPFM measurements were performed using a gold coated Si tip with 6 nm a radius of curvature (HYDRA6R-100NG-10, APPNANO) as the probe in a non-contact mode with an AC voltage of -1 to +1 V.

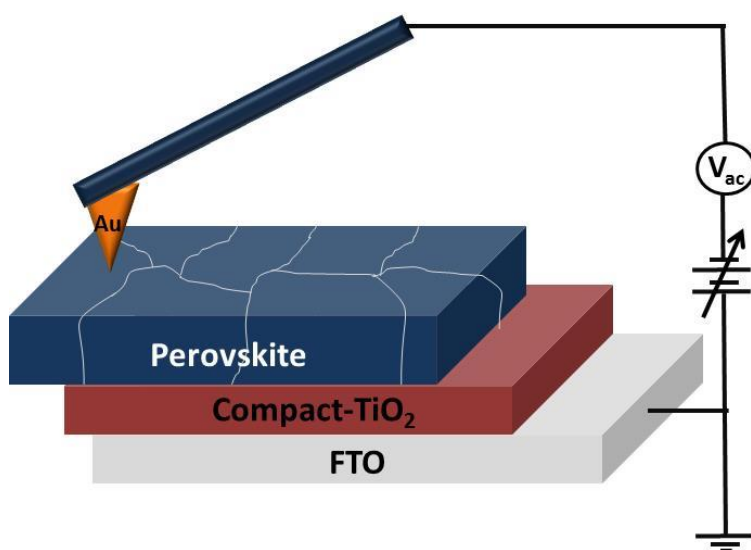

**Figure S2.** Illustration of the KPFM set up.

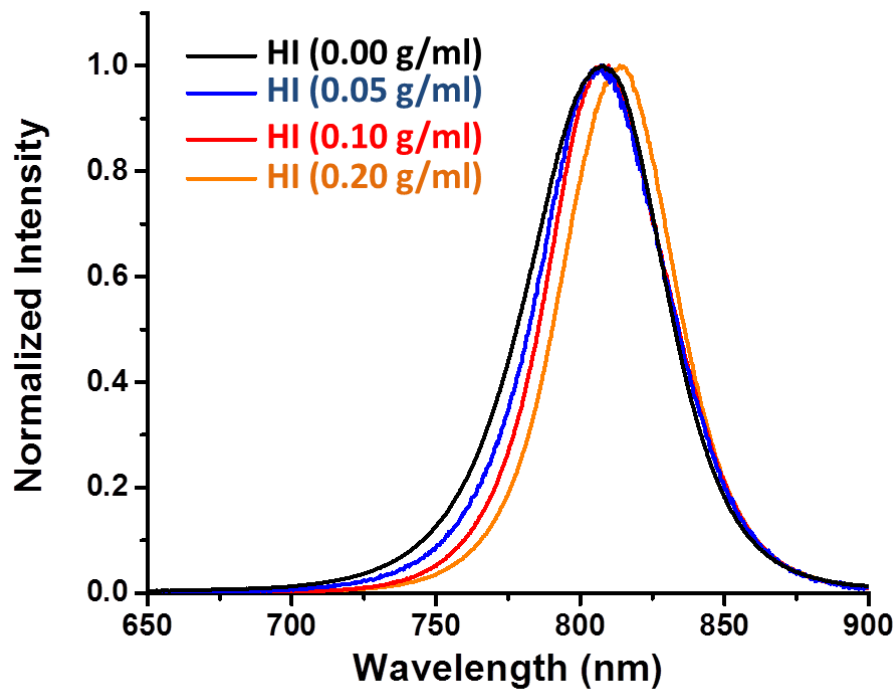

**Figure S3.** PL spectra of HC(NH<sub>2</sub>)<sub>2</sub>PbI<sub>3</sub> perovskites excited at 405 nm.

Bi-exponential function  $y = A_1 \exp(-t/\tau_1) + A_2 \exp(-t/\tau_2)$ , has been used to extract the time constants for each PL evolution in **Figure 3a** in particular the fast component which is attributed to the extraction of photo-generated carriers (i.e., electrons across the HC(NH<sub>2</sub>)<sub>2</sub>PbI<sub>3</sub>/TiO<sub>2</sub> interface). The results are summarised in the **Table S1**.

**Table S1.** Time constants extracted from the fitting of PL decay traces in **Figure 3a**.

| HI concentration<br>[g ml <sup>-1</sup> ] <sup>[a]</sup> | 0   | 0.05 | 0.10 | 0.20 |
|----------------------------------------------------------|-----|------|------|------|
| $\tau_1$ [ns]                                            | 8.6 | 3.5  | 2.1  | 2.1  |

[a] HI contents in 1 ml of HC(NH<sub>2</sub>)<sub>2</sub>PbI<sub>3</sub>/DMF solution

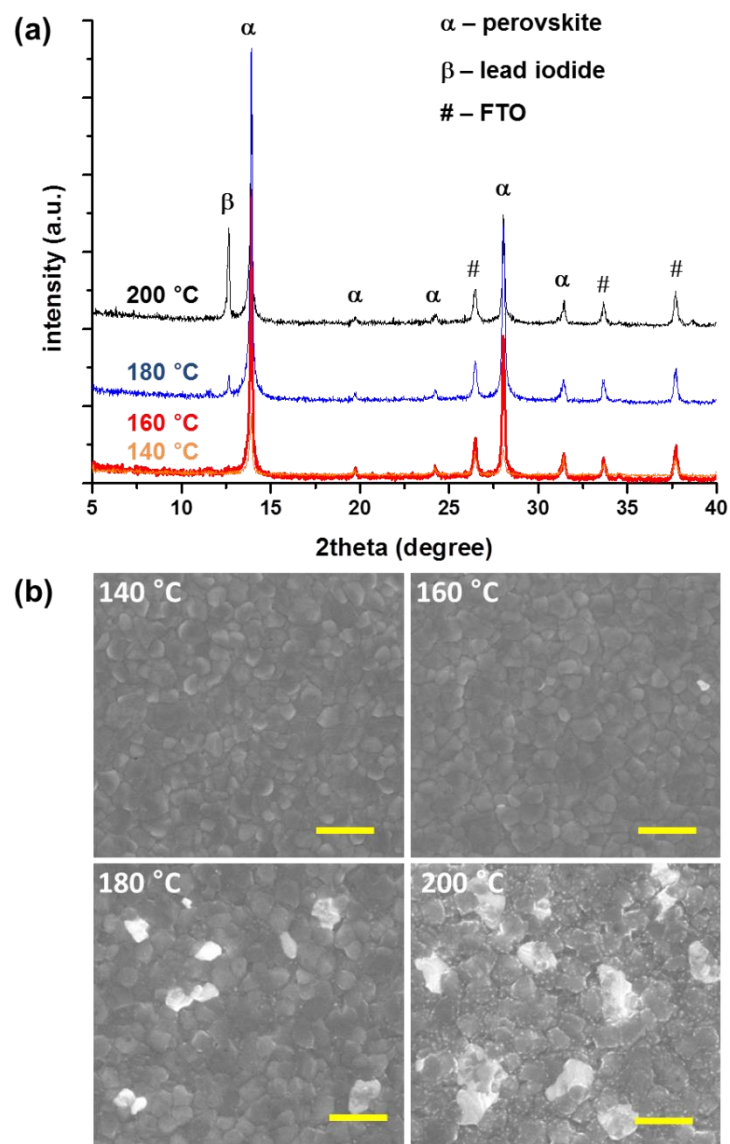

**Figure S4.** a) XRD patterns and b) top-view SEM images of gas-assisted spin coated  $\text{HC}(\text{NH}_2)_2\text{PbI}_3$  films with  $0.1 \text{ g ml}^{-1}$  HI additive annealed at different temperatures (140, 160, 180, and 200 °C). The yellow scale bar represents 1  $\mu\text{m}$ .

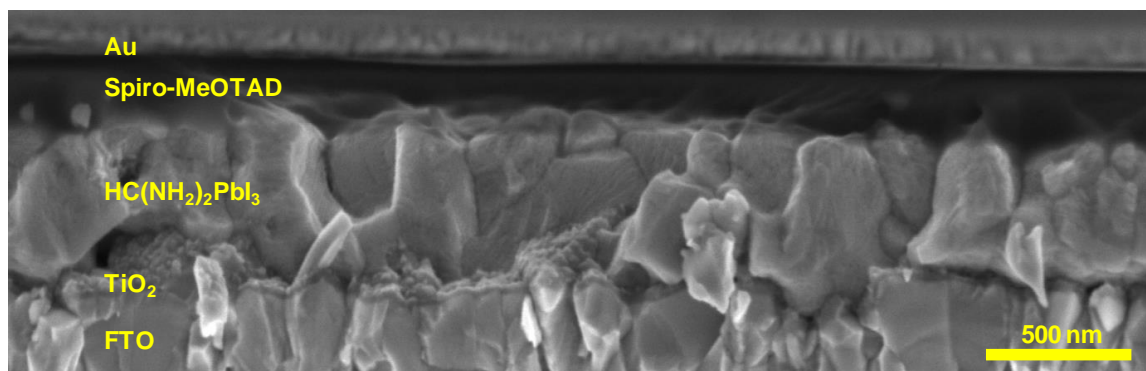

**Figure S5.** A cross-sectional SEM image of a representative device.



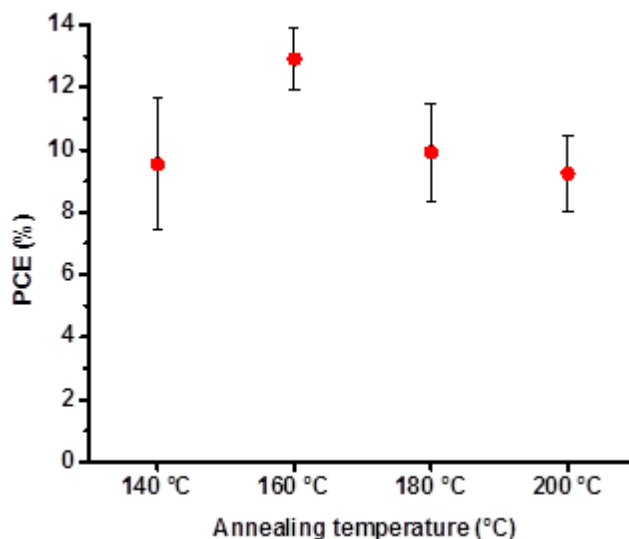

**Figure S6.** Distributions of energy conversion efficiencies of devices with  $\text{HC}(\text{NH}_2)_2\text{PbI}_3$  formed using fixed concentrations of HI additive ( $0.1 \text{ g ml}^{-1}$ ) at different annealing temperatures. Error bars are standard deviations of device efficiencies.

**Table S2.** Average solar cell performance of devices with  $\text{HC}(\text{NH}_2)_2\text{PbI}_3$  formed using fixed concentrations of HI additive ( $0.1 \text{ g ml}^{-1}$ ) at different annealing temperatures.

| Annealing temperature<br>[°C] | Jsc<br>[mA cm <sup>-2</sup> ] | Voc<br>[mV] | FF | Rs<br>[Ω cm] | Rsh<br>[Ω cm] | PCE<br>[%] | Standard deviation<br>of PCE |
|-------------------------------|-------------------------------|-------------|----|--------------|---------------|------------|------------------------------|
| 140                           | 19                            | 911         | 54 | 21           | 3288          | 10         | 2.11                         |
| 160                           | 23                            | 902         | 63 | 18           | 2204          | 13         | 0.97                         |
| 180                           | 22                            | 895         | 50 | 56           | 1813          | 10         | 1.56                         |
| 200                           | 22                            | 881         | 49 | 51           | 2873          | 9          | 1.19                         |

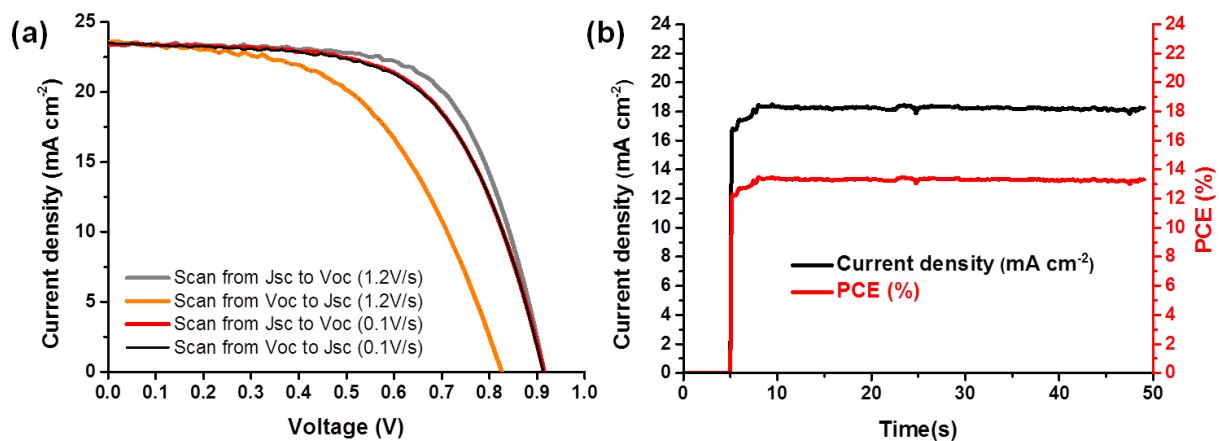

**Figure S7.** Stabilized J and PCE curves held at maximum power point of a 13 %  $\text{HC}(\text{NH}_2)_2\text{PbI}_3$  device.

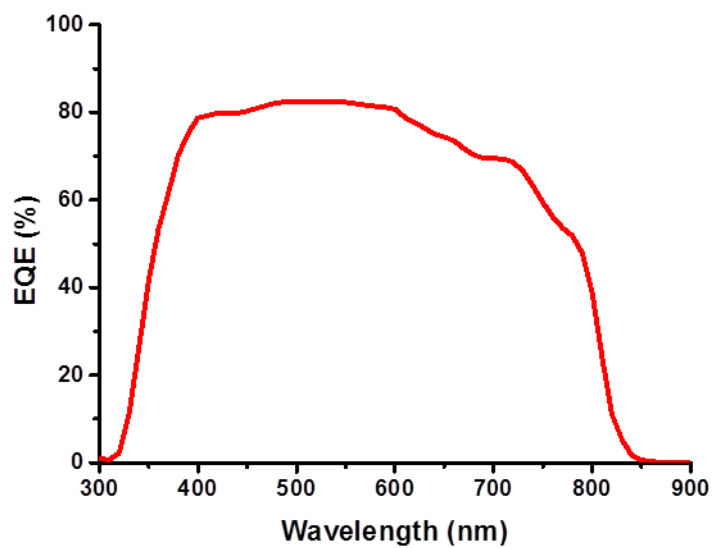

**Figure S8.** a) J-V curve and b) external quantum efficiency (EQE) of the best performing  $\text{HC}(\text{NH}_2)_2\text{PbI}_3$  planar device in this work.

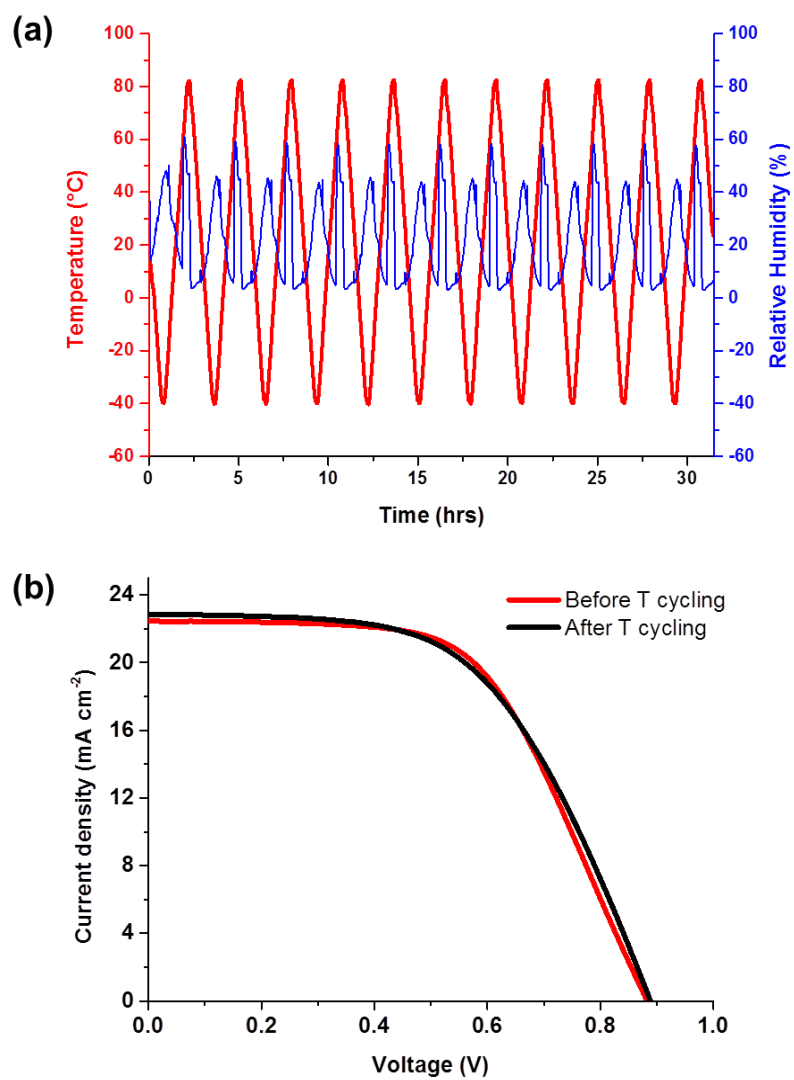

**Figure S9.** a) Temperature and relative humidity recorded during 10 cycles of thermal cycling.

b) J-V of a 12 % HC(NH<sub>2</sub>)<sub>2</sub>PbI<sub>3</sub> solar device before and after the thermal cycling test.
